# Supplementary material for: DNA-PKcs regulates myogenesis in an AKT-dependent manner independent of induced DNA damage
Source: bioRxiv preprint, doi:10.1101/2022.06.23.497315, version 1 (2022-06-23)
Supplement: Supplementary Figures S1 to S5 [file 497315_file08.pdf]

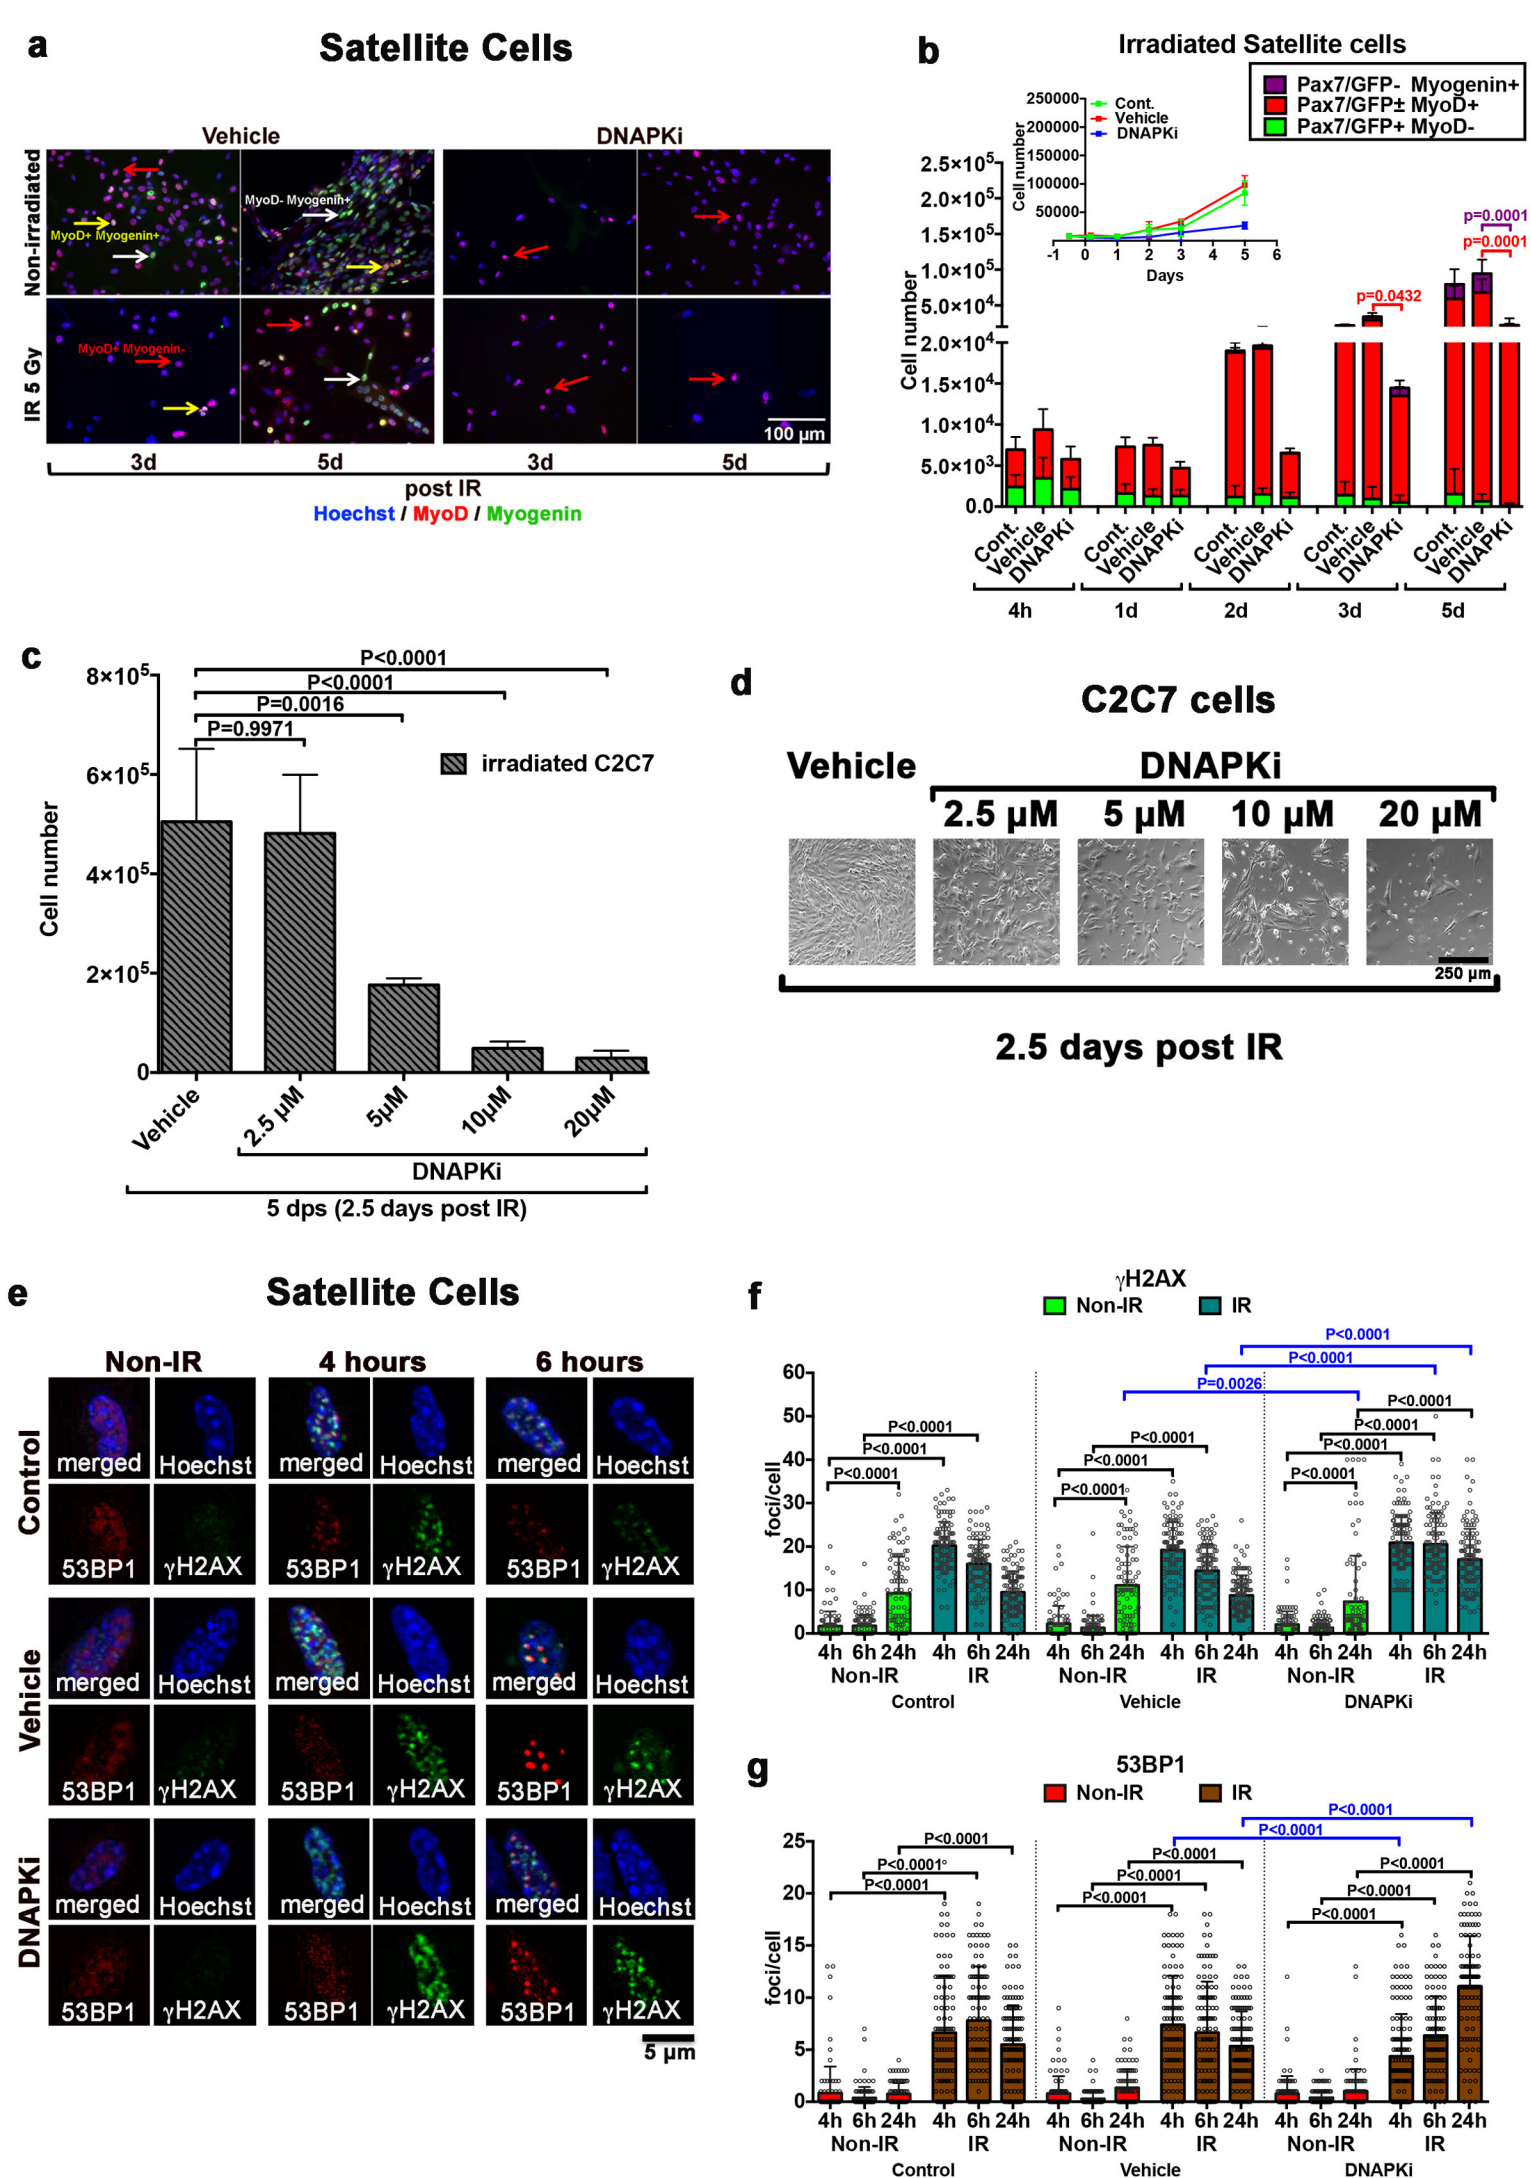

**Figure S1**

# C2C7 cells

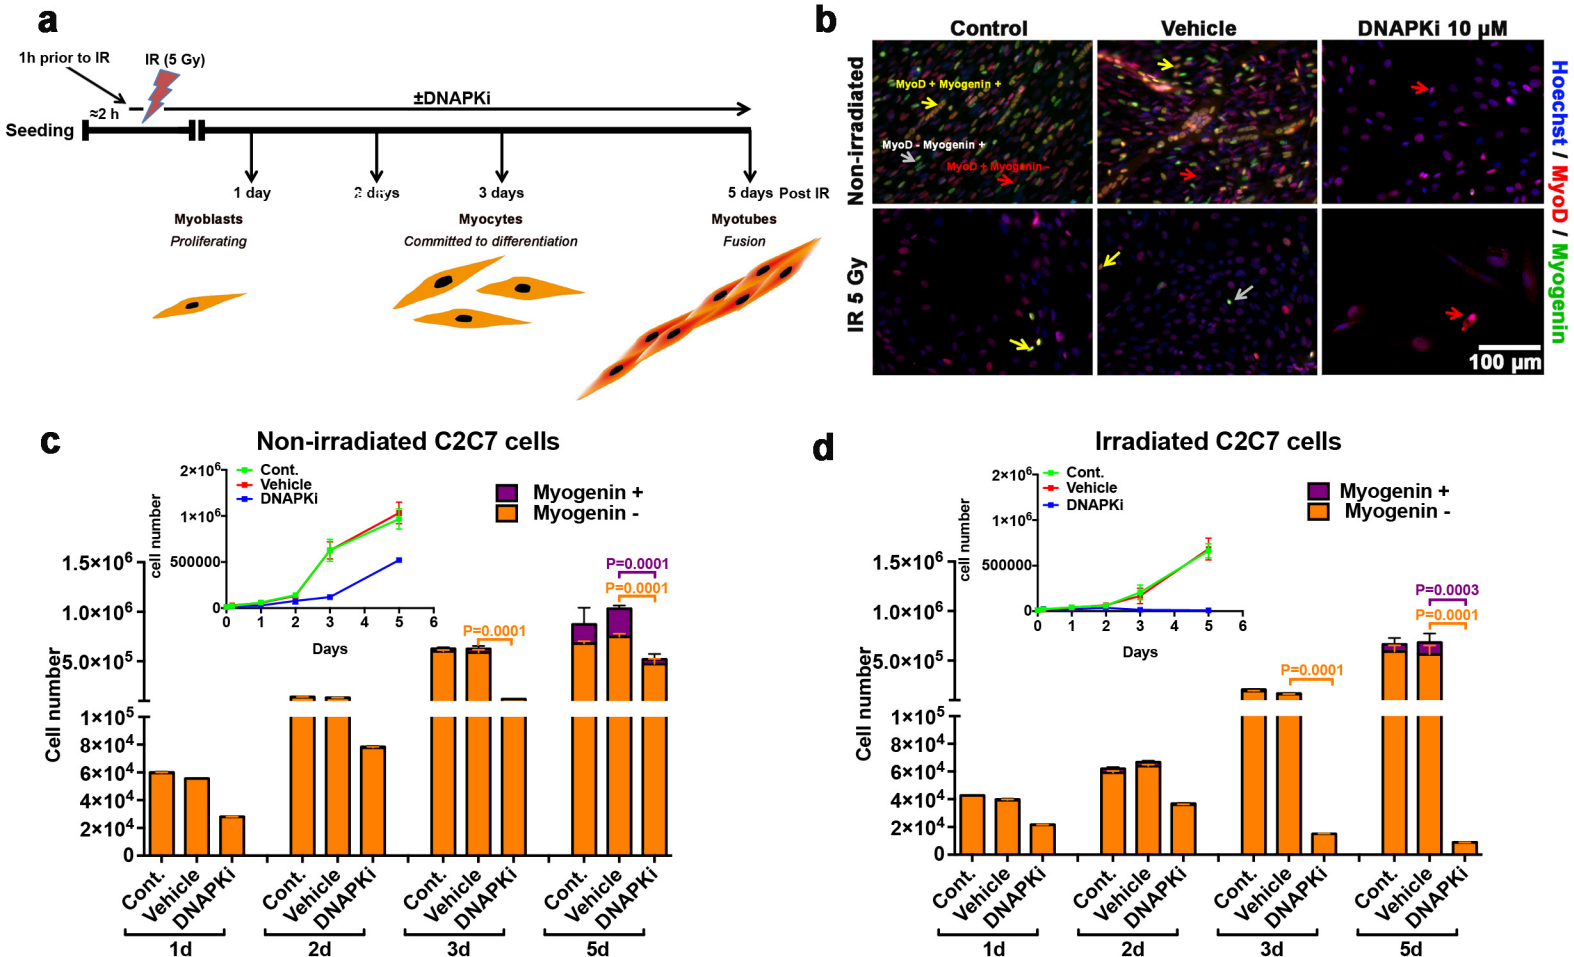

Figure S2

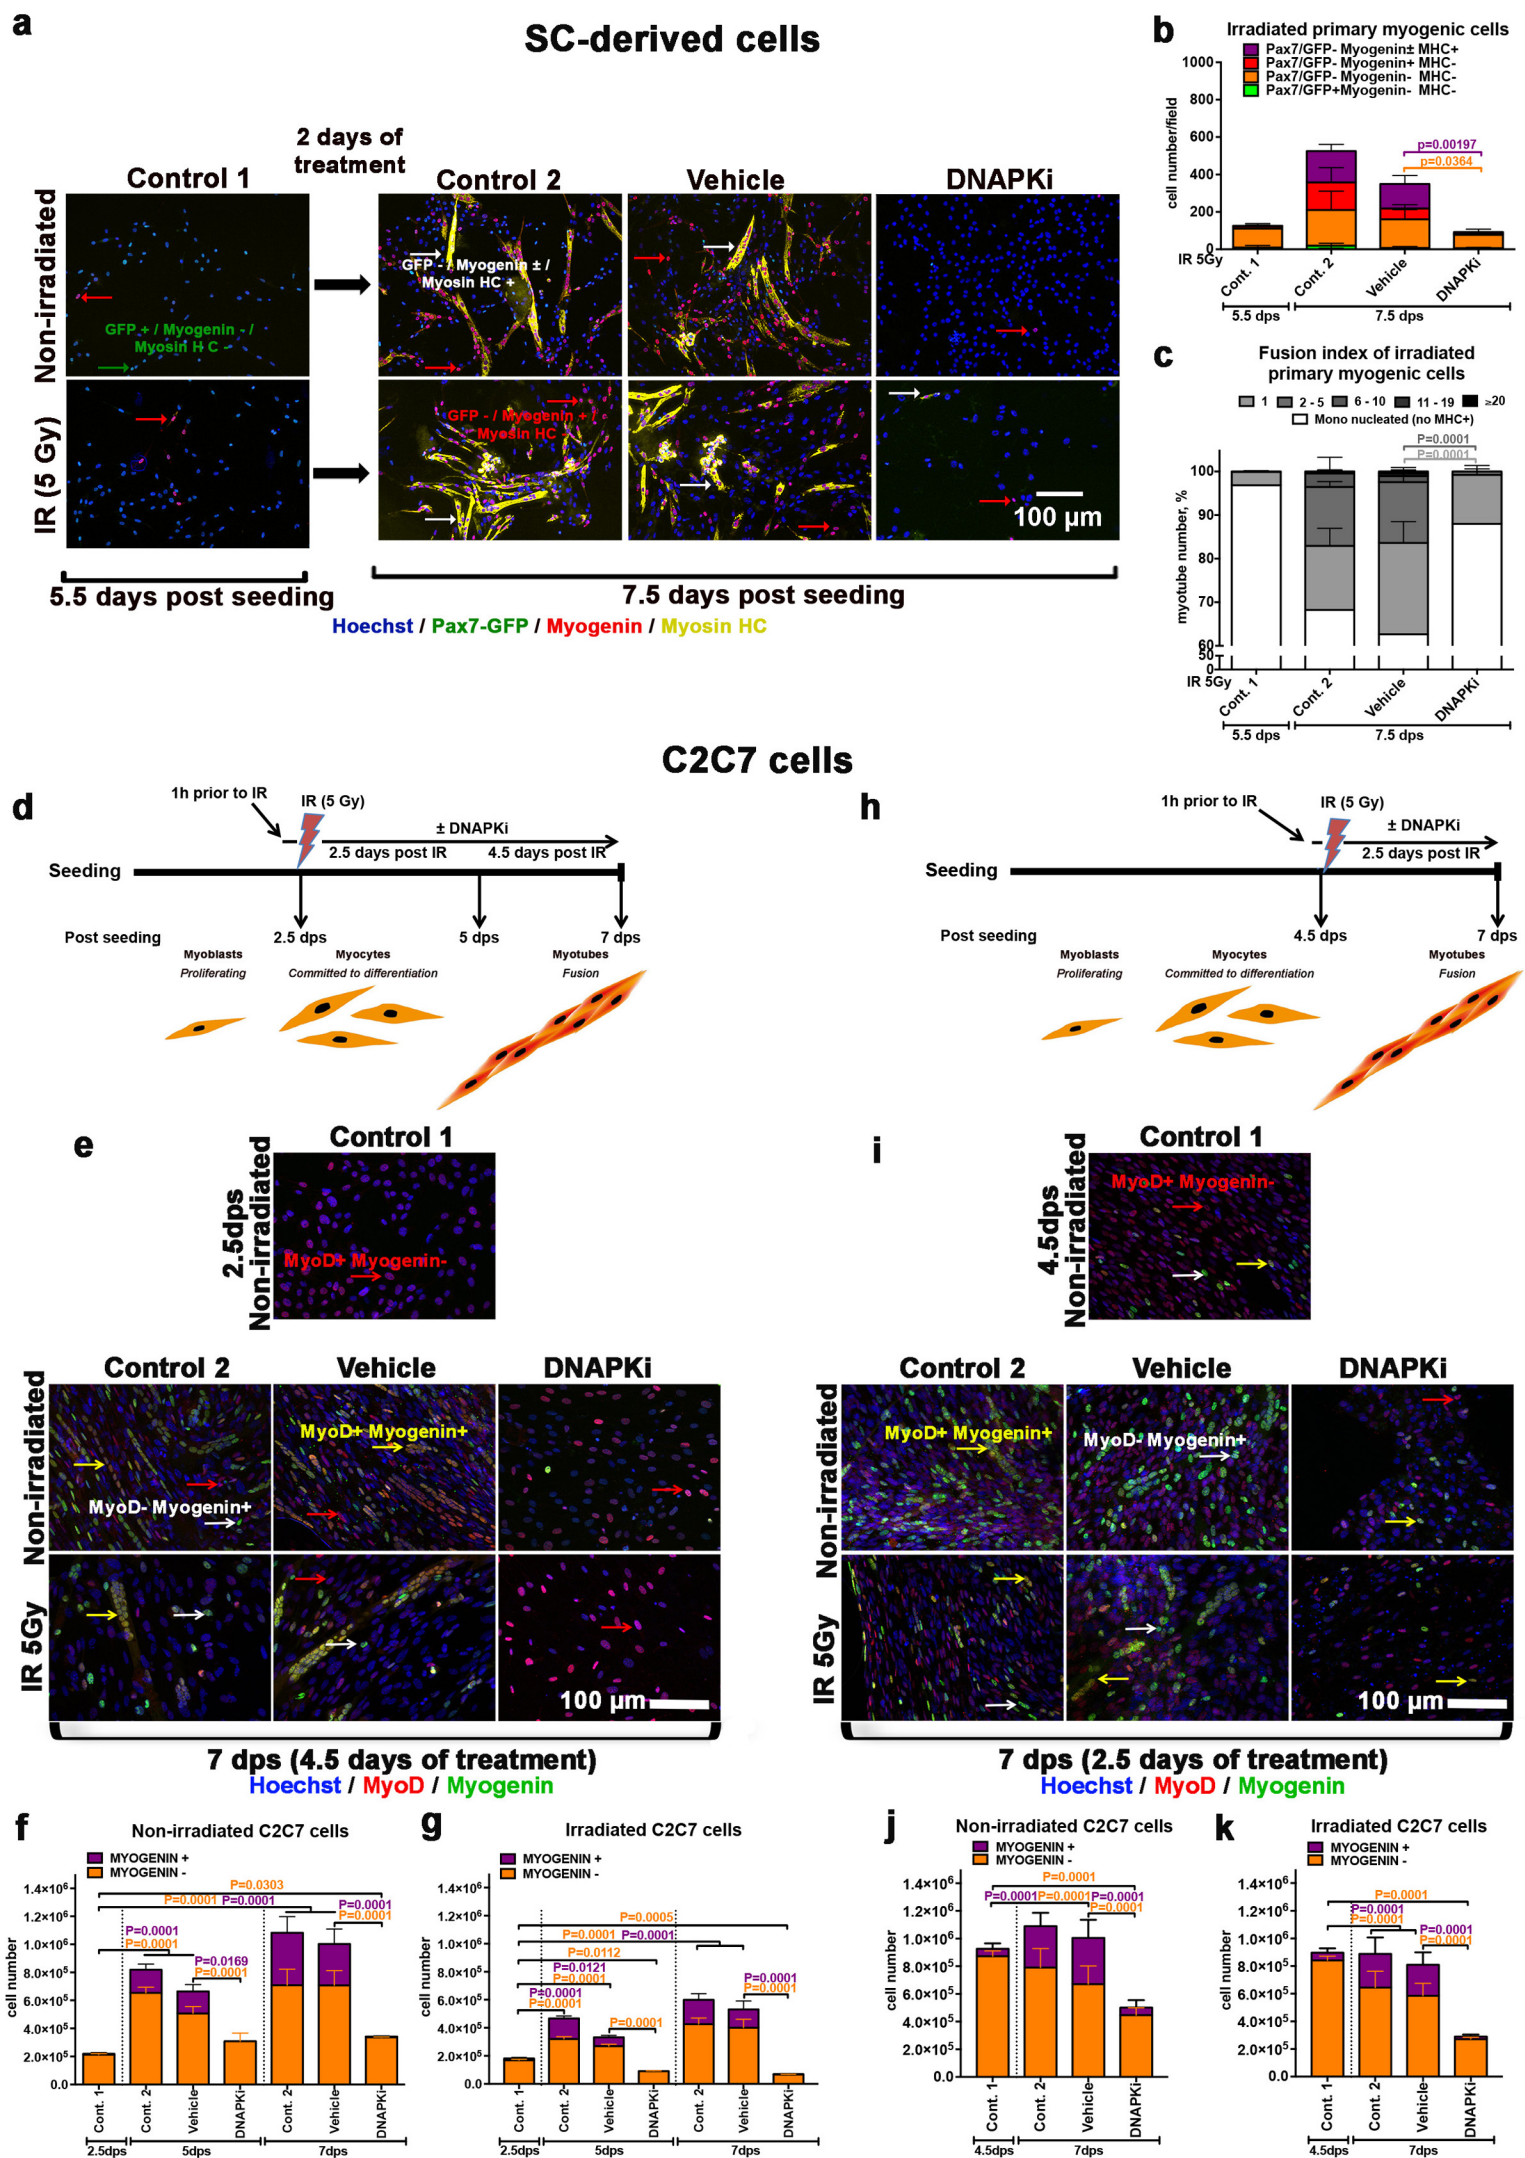

**Figure S3**

**a**

Uninjured

5dpi

7dpi

WT (BALB/c)

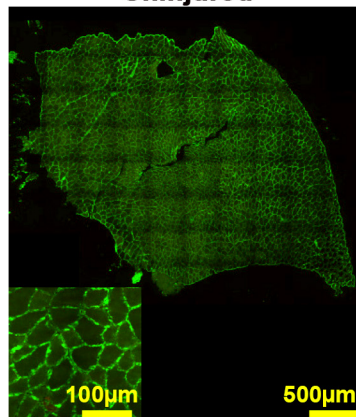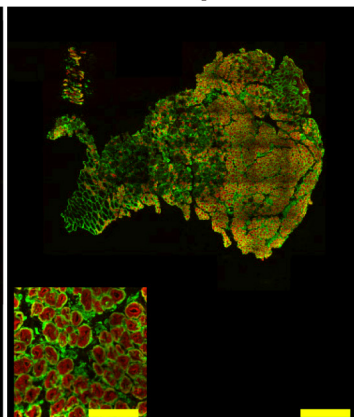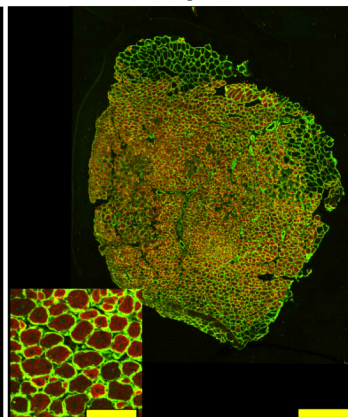

SCID

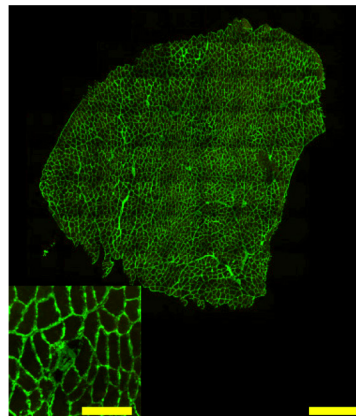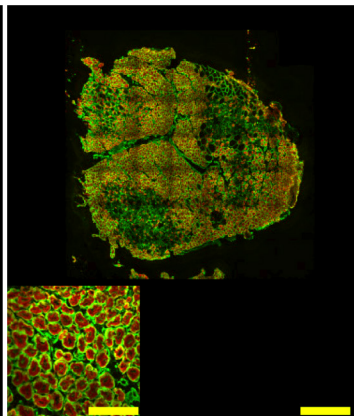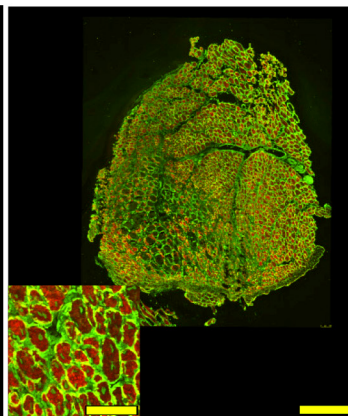

Laminin/eMHC

**b**

Regenerating fibers

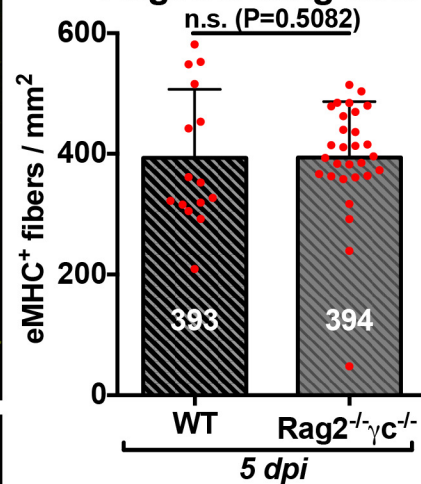**Figure S4**

**Figure 2b**

Western blot analysis of MyoD, GAPDH, and Myogenin expression in C2C12 cells under various conditions. The top panel shows MyoD, GAPDH, and Myogenin levels. The middle panel shows a fluorescence image of the same blot. The bottom panel shows a zoomed-in view of the MyoD, GAPDH, and Myogenin bands. The conditions are: Control 2, Vehicle, DNAPKI (2.5, 5, 10, 20), P/CAF, Act1, and Merge. Molecular weight markers are indicated on the right: 55 kDa, 35 kDa, 25 kDa, and 15 kDa.

**Figure 2g**

C1 Cont. 2 Vehic. DNAPKI  
Insulin - - + - + - +

Protein X

Akt2

GAPDH

Protein Y

Protein z

Protein T

Myogenin

Protein H

The figure displays two Western blot panels. The top panel shows protein levels for Protein X, Akt2, GAPDH, and Protein Y across 12 lanes. The bottom panel shows protein levels for Protein z, Protein T, Myogenin, and Protein H across 12 lanes. In both panels, the first four lanes are labeled 'C1 Cont.' and the next eight lanes are labeled '2 Vehic. DNAPKI'. The lanes are further divided by insulin treatment: lanes 1, 5, and 9 are control (-); lanes 2, 6, and 10 are insulin-treated (+); lanes 3, 7, and 11 are insulin-treated with DNAPKI (-); and lanes 4, 8, and 12 are insulin-treated with DNAPKI (+). A red box in the top panel highlights the Akt2 bands, and a red box in the bottom panel highlights the Myogenin bands. A gel image is visible in the background of the right side of the figure.

Western blot analysis of p-Akt, GAPDH, and Myogenin expression in C2C12 cells. The blot shows three rows of bands for p-Akt, GAPDH, and Myogenin. The lanes are labeled: Cont, 2, Vehicle, 0.05%, 0.1%, 2.5, 5, 10, 20, and Marker. The p-Akt row shows a strong band in the 2.5% lane, which is highlighted with a red box and a pair of scissors. The GAPDH row shows consistent band intensity across all lanes. The Myogenin row shows increasing band intensity from 2.5% to 20%.

Western blot analysis showing Akt phosphorylation and Myogenin expression. The blot is divided into two main sections: 5.5 dps and 7.5 dps. The 5.5 dps section includes lanes for Cont. 1, Cont. 2, and Vehicle. The 7.5 dps section includes lanes for Vehicle and DNAPK1 at concentrations of 0.1%, 2.5%, 5%, 10%, and 20%. The blots show p-Akt, Akt, Myogenin, and GAPDH. Hand-drawn scissors indicate the regions of interest for Akt phosphorylation and Myogenin expression.

[illegible]

**Gel 1**

gel no. 1

Control 2 Vehicle DMAPP PMA DMAPP+PMA Akt1

p-Akt 1

Akt 1

Myogenin

GAPDH

70 50 35

**Gel 2**

Control 2 Vehicle DMAPP PMA DMAPP+PMA Akt2

p-Akt 2

Akt 2

Myogenin

GAPDH

70 50 35

input 199R 199M Akt1 AK2 DNARXos input X Conditions

p300

Figure 1 displays high-contrast and low-contrast images of DNA-PKcs and IgM/Ak2. The top panel shows high-contrast images of DNA-PKcs (left) and IgM/Ak2 (right) with lanes for Input, IgM, Ak2, and DNA-PKcs. The bottom panel shows low-contrast images of the same samples. A blue arrow points from the high-contrast image to the low-contrast image.

Western blot analysis of GAPDH and H2AX phosphorylation in C2C12 cells. The top panel shows GAPDH/MyoG (loading control) and the bottom panel shows pT2AX/H2AX (phosphorylated H2AX). Lanes are labeled: pm, 0, 0.05%, 0.1%, 2.5%, 5%, 10%, and 20%. GAPDH/MyoG levels are consistent across all lanes, indicating equal protein loading. pT2AX/H2AX levels increase with increasing concentrations of 2,2,2-trifluoroethylamine, with the highest phosphorylation observed at 20%.
